# Supplementary material for: Endothelial pannexin-1 channels modulate macrophage and smooth muscle cell activation in abdominal aortic aneurysm formation
Source: PubMed Central journal article supplement (PMC8938517; doi:10.1038/s41467-022-29233-4), 2022-03-21
Supplement: 41467_2022_29233_MOESM1_ESM.pdf [file 41467_2022_29233_MOESM1_ESM.pdf]

# Supplementary Information Inventory

## Endothelial pannexin-1 channels modulate macrophage and smooth muscle cell activation in abdominal aortic aneurysm formation

Amanda C. Filiberto<sup>1†</sup>, Michael D. Spinosa<sup>2†</sup>, Craig T. Elder<sup>1</sup>, Gang Su<sup>1</sup>, Victoria Leroy<sup>1</sup>, Zachary Ladd<sup>1</sup>, Guanyi Lu<sup>1</sup>, J. Hunter Mehaffey<sup>2</sup>, Morgan D. Salmon<sup>2</sup>, Robert B. Hawkins<sup>2</sup>, Kodi S. Ravichandran<sup>3</sup>, Brant E. Isakson<sup>4</sup>, Gilbert R. Upchurch, Jr.<sup>1</sup>, & Ashish K. Sharma<sup>1\*</sup>

<sup>1</sup>Department of Surgery, University of Florida, Gainesville, FL

<sup>2</sup>Department of Surgery, University of Virginia, Charlottesville, VA

<sup>3</sup>Department of Microbiology, Immunology and Cancer Biology, University of Virginia, Charlottesville, VA

<sup>4</sup>Department of Molecular Physiology and Biological Physics, University of Virginia, Charlottesville, VA

† Equal contribution

**Correspondence to:** Email: [ashish.sharma@surgery.ufl.edu](mailto:ashish.sharma@surgery.ufl.edu) (A.K.S.)

## Contents:

### 1. Supplementary Figures

- a. Supplementary Figure 1
- b. Supplementary Figure 2
- c. Supplementary Figure 3
- d. Supplementary Figure 4
- e. Supplementary Figure 5
- f. Supplementary Figure 6
- g. Supplementary Figure 7
- h. Supplementary Figure 8

### 2. Source Data File in .xlsx format (separate)

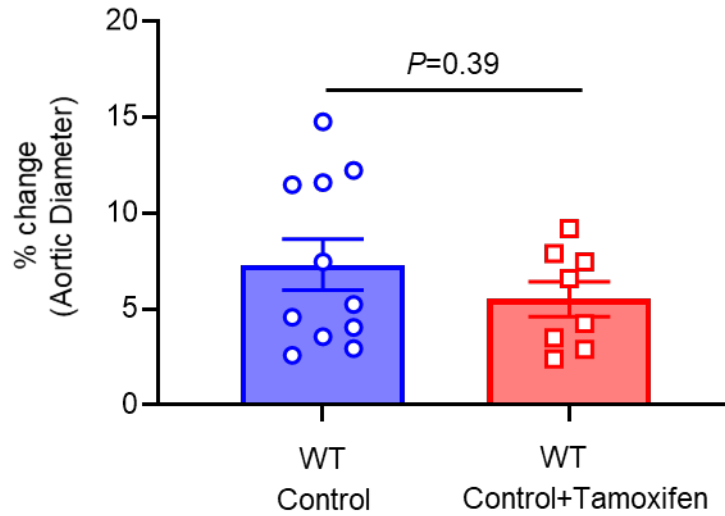

**Supplementary Fig. 1** Tamoxifen treatment does not alter the aortic diameter compared to deactivated elastase-treated (control) mice on day 14.  $n=8-11/\text{group}$ . Data is represented as mean values  $\pm$  SEM and comparative statistical analyses was done by two-tailed t-test. Source data are provided as a Source Data file.

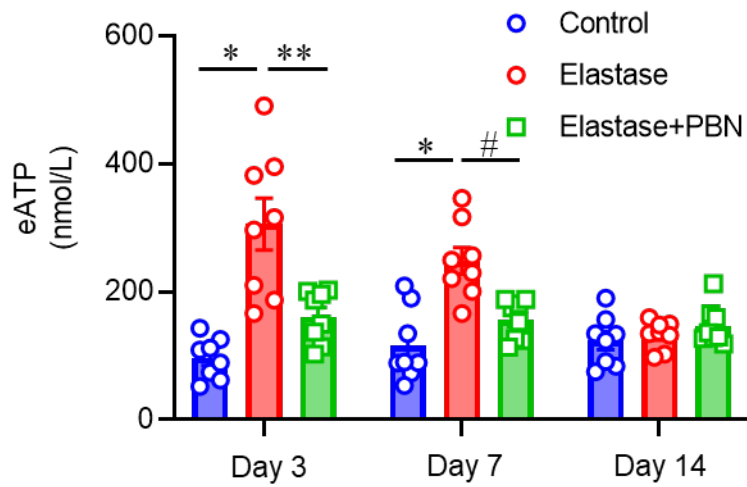

**Supplementary Fig. 2** A significant increase in extracellular (e)-ATP content was observed in plasma of elastase-treated mice compared to controls. PBN-treated mice displayed a significant attenuation of eATP compared to elastase-treated mice. \* $P < 0.0001$ ; \*\* $P = 0.001$ ; # $P = 0.004$ ;  $n = 8$  mice/group. Data is represented as mean values  $\pm$  SEM and comparative statistical analyses was done by one-way ANOVA followed by multiple comparisons. Source data are provided as a Source Data file.

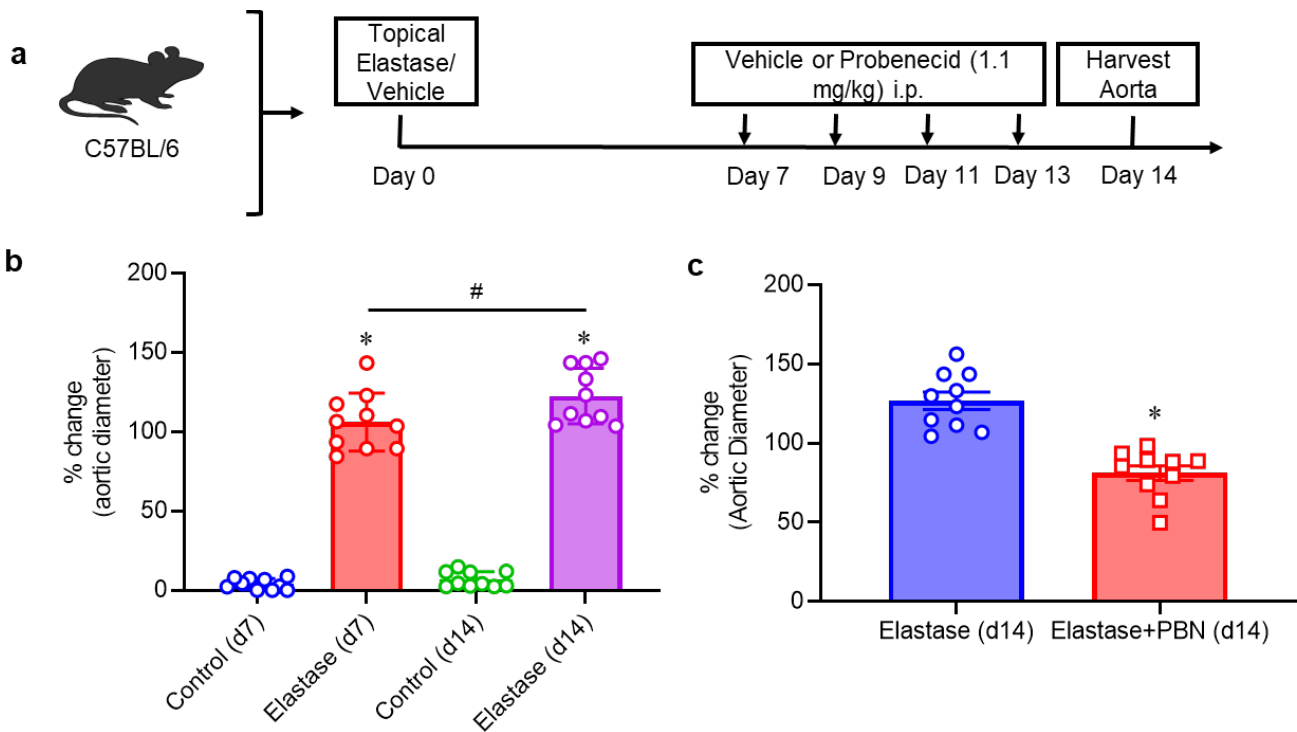

**Supplementary Fig. 3 a** Using the elastase AAA murine model, the protective role of Probenecid (PBN) administered **after** the formation of AAAs on day 7 was investigated. **b** AAA formation in elastase-treated WT mice was significantly increased compared to respective controls on days 7 and 14, respectively.  $*P < 0.0001$  vs. respective controls;  $\#P = 0.03$ ;  $n = 8-10$ /group. Data is represented as mean values  $\pm$  SEM and comparative statistical analyses was done by one-way ANOVA. **c** Treatment with PBN (after day 7) significantly attenuated aortic diameter in elastase-treated mice on day 14.  $*P = 0.0001$ ;  $n = 10$ /group. Data is represented as mean values  $\pm$  SEM and comparative statistical analyses was done by two-tailed t-test. Source data are provided as a Source Data file.

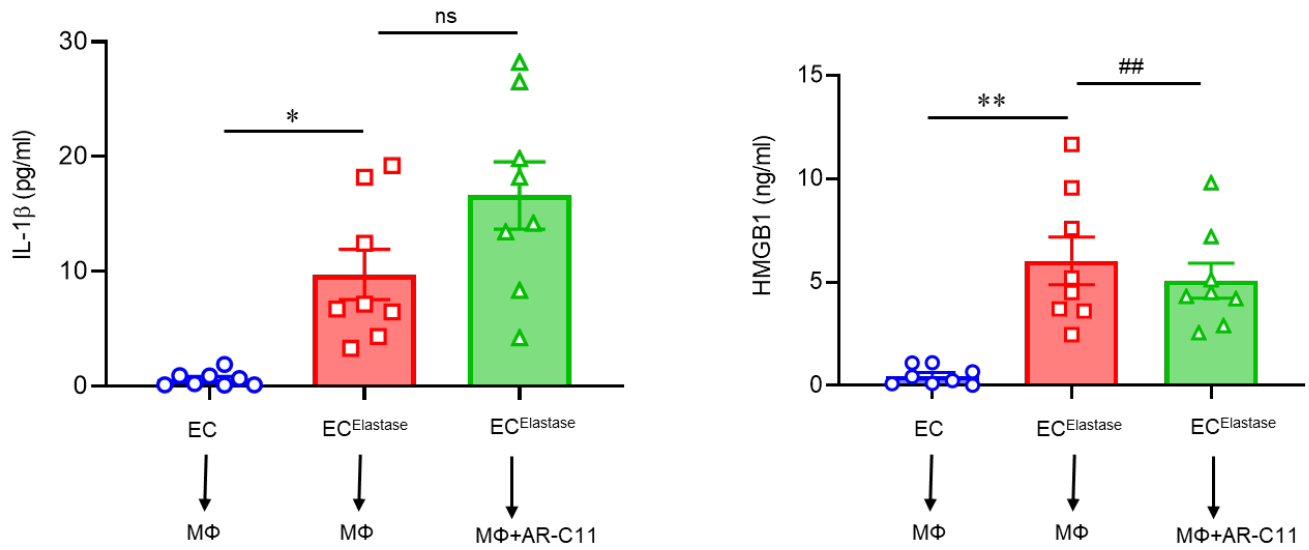

**Supplementary Fig. 4 P2Y2 inhibition of macrophages fails to mitigate cytokine secretion induced by EC-dependent Panx1/ATP signaling.** CMT from elastase-treated ECs to macrophages induces a significant upregulation of IL-1 $\beta$  and HMGB1 secretion, which was not blocked by pretreatment of macrophages with P2Y2 inhibitor (AR-C11; 10 $\mu$ M). \* $P=0.01$ ; \*\* $P=0.0003$ ; ns, not significant,  $P=0.07$ ; ## $P=0.69$ ;  $n=8$ /group. Data is represented as mean values  $\pm$  SEM and comparative statistical analyses was done by one-way ANOVA. Source data are provided as a Source Data file.

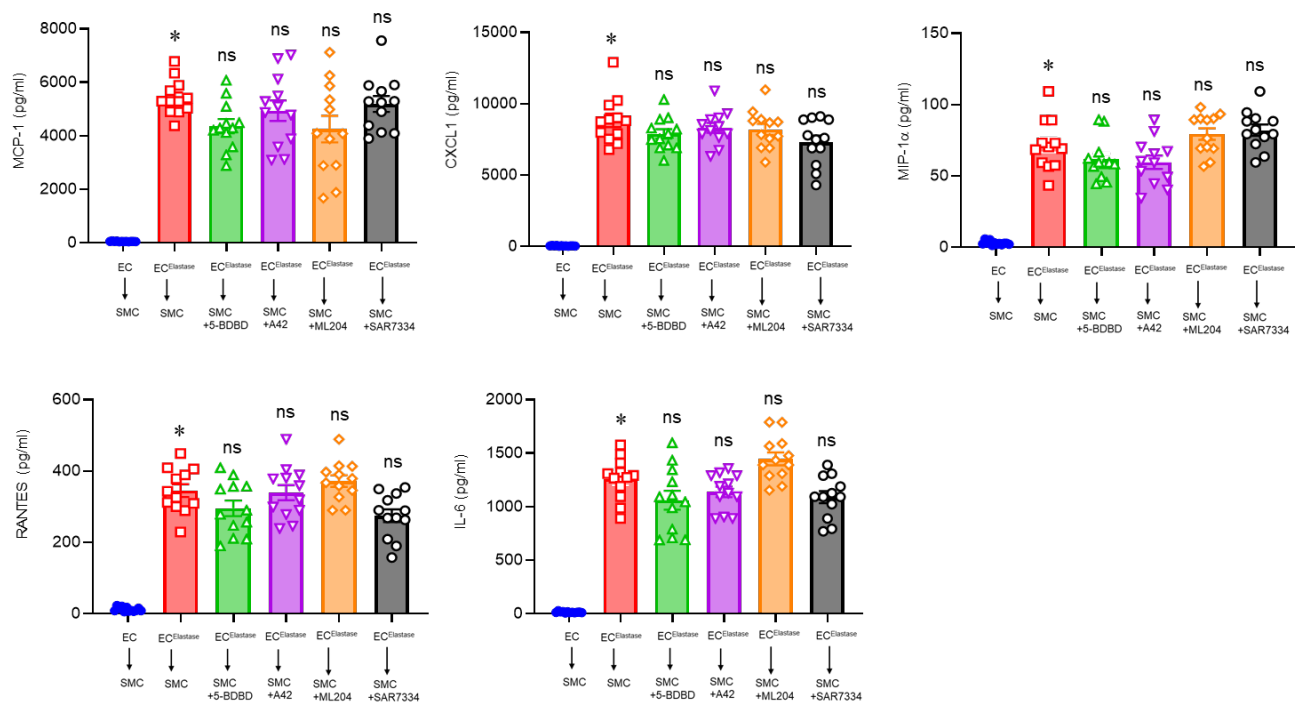

**Supplementary Fig. 5 P2X4, TRPV1, TRPC4 or TRPC6 inhibition of SMCs does not attenuate cytokine secretion.** Activation of SMCs by CMT from elastase-treated ECs results in a multifold increase in proinflammatory cytokine production which was not inhibited by pretreatment with either P2X4 (5-BDBD; 50 $\mu$ M), TRPV1 (A42), TRPC4 (ML204) or TRPC6 (SAR73) inhibitors (1 $\mu$ M each). \* $P$ <0.001 vs. control (EC $\rightarrow$ SMC); ns, not significant vs. EC(elastase) $\rightarrow$ SMC; n=12/group. Data is represented as mean values  $\pm$  SEM and comparative statistical analyses was done by one-way ANOVA. Source data are provided as a Source Data file.

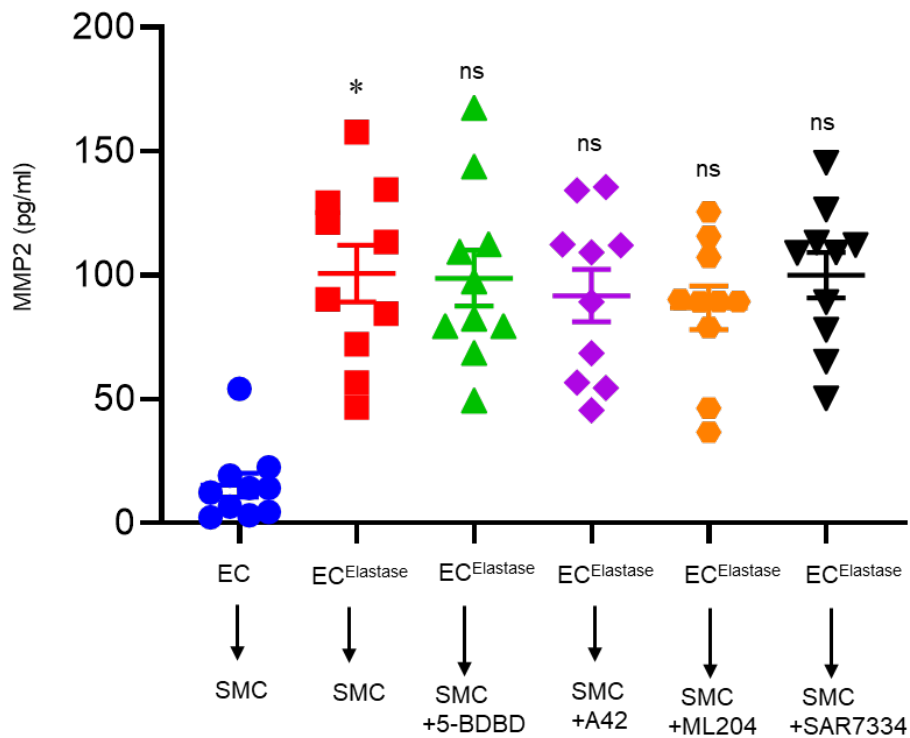

**Supplementary Fig. 6 P2X4, TRPV1, TRPC4 or TRPC6 inhibition of SMCs does not attenuate MMP2 activity.** Activation of SMCs by CMT from elastase-treated ECs results in a multifold increase in MMP2 activity which was not inhibited by pretreatment with either P2X4 (5-BDBD; 50 $\mu$ M), TRPV1 (A42), TRPC4 (ML204) or TRPC6 (SAR73) inhibitors (1 $\mu$ M each). \* $P=0.0001$ ; ns, not significant,  $P=0.9$  vs. EC(elastase) $\rightarrow$ SMC;  $n=8$ /group. Data is represented as mean values  $\pm$  SEM and comparative statistical analyses was done by one-way ANOVA. Source data are provided as a Source Data file.

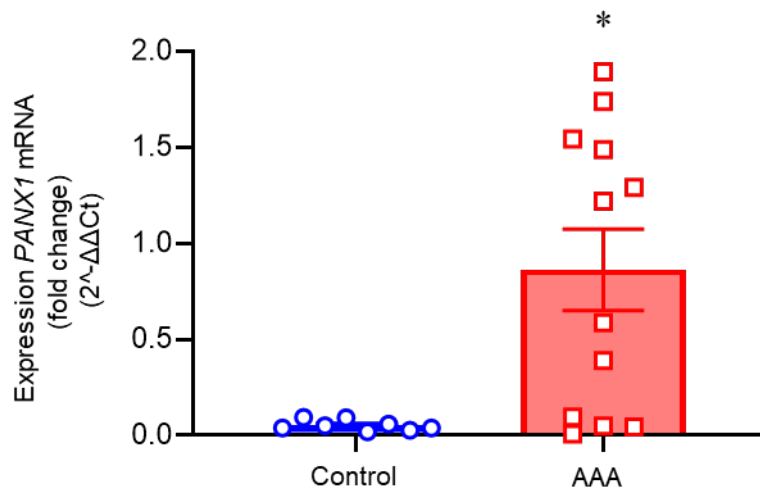

**Supplementary Fig. 7 *PANX1* mRNA expression is increased in AAA patients.** A multi-fold increase in *PANX1* mRNA expression was observed in aortic tissue from AAA patients compared to controls. \* $P=0.01$ ;  $n=8-12$ /group. Data is represented as mean values  $\pm$  SEM and comparative statistical analyses was done by two-tailed t-test. Source data are provided as a Source Data file.



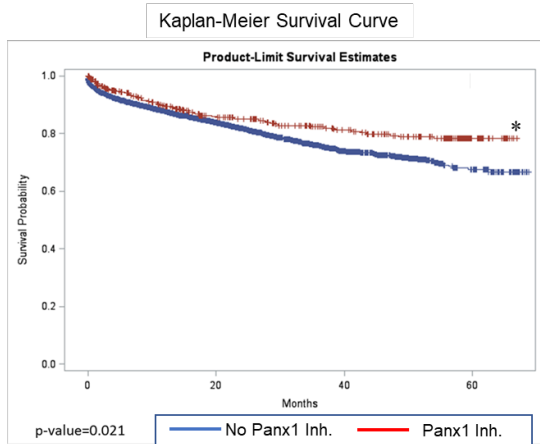

Cox Proportional Hazard Model

| Parameter                             | Hazards Ratio | p-value |
|---------------------------------------|---------------|---------|
| Age (years)                           | 1.05          | <0.0001 |
| Sex (Female)                          | 0.93          | 0.357   |
| Race (White)                          | 0.94          | 0.605   |
| Tobacco Use                           | 1.57          | 0.014   |
| Diabetes Mellitus                     | 1.05          | 0.579   |
| Hypertension                          | 1.23          | 0.456   |
| Chronic Obstructive Pulmonary Disease | 1.76          | <0.0001 |
| Peripheral Vascular Disease           | 1.15          | 0.133   |
| Congestive Heart Failure              | 1.78          | <0.0001 |
| Cancer                                | 1.48          | <0.0001 |
| Stroke                                | 2.89          | <0.0001 |
| Operative Repair                      | 0.68          | <0.0001 |
| Panx1 Inhibitors                      | 0.65          | 0.001   |

Univariate differences between groups

| Variable                              | Panx1 Inhibitors (n=440) | No Panx1 Inhibitors (n=4109) | p value |
|---------------------------------------|--------------------------|------------------------------|---------|
| Age (years)                           | 66 ± 16                  | 67 ± 16                      | 0.198   |
| Sex (Male)                            | 299 (68.0%)              | 2773 (67.5%)                 | 0.842   |
| Race (White)                          | 377 (85.7%)              | 3575 (87.0%)                 | 0.435   |
| Tobacco Use                           | 74 (16.8%)               | 620 (15.1%)                  | 0.176   |
| Diabetes Mellitus                     | 116 (26.4%)              | 868 (21.1%)                  | 0.011   |
| Hypertension                          | 378 (85.9%)              | 3558 (86.6%)                 | 0.737   |
| Chronic Obstructive Pulmonary Disease | 103 (23.4%)              | 892 (21.7%)                  | 0.412   |
| Peripheral Vascular Disease           | 82 (18.6%)               | 720 (17.5%)                  | 0.560   |
| Congestive Heart Failure              | 134 (30.5%)              | 605 (14.7%)                  | <0.001  |
| Cancer                                | 85 (19.3%)               | 771 (18.8%)                  | 0.777   |
| Stroke                                | 27 (6.1%)                | 266 (6.5%)                   | 0.784   |
| Operative Repair                      | 19 (4.3%)                | 227 (5.5%)                   | 0.288   |
| Probenecid                            | 141 (3.1%)               | -                            |         |
| Spironolactone                        | 313 (6.9%)               | -                            |         |

**Supplementary Fig. 8 Panx1 inhibitors are associated with decreased mortality in aortic aneurysm patients.** Retrospective analysis of human aortic aneurysm patient data demonstrates a significantly lower risk of mortality after 5-years in patients who were receiving Probenecid or Spironolactone (Panx1 inhibitors) compared to aortic aneurysm patients without these medications. Kaplan-Meier survival analysis and Cox Proportional Hazards model was utilized to compare unadjusted and risk-adjusted long-term survival respectively. \*P=0.02.
